# Supplementary material for: Immunogenicity of The BNT162b2 COVID-19 mRNA and ChAdOx1 nCoV-19 Vaccines in Patients with Hemoglobinopathies
Source: MDPI journal article supplement (doi:10.3390/vaccines10020151), 2022-01-20
Supplement: s1 [file s1]

# Immunogenicity of The BNT162b2 COVID-19 mRNA and ChAdOx1 nCoV-19 Vaccines in Patients with Hemoglobinopathies

## Supplementary Document

### Table of contents

|                                                                                                                                   |   |
|-----------------------------------------------------------------------------------------------------------------------------------|---|
| <b>Table S1:</b> COVID-19 binding antibodies correlation with the number of vaccine doses and the history of prior infection..... | 2 |
| <b>Table S2:</b> Characteristics of patients with transfusion-dependent thalassemia .....                                         | 3 |
| <b>Table S3:</b> Characteristics of patients with sickle cell disease .....                                                       | 4 |
| <b>Table S4:</b> Comparison between time of sample collection and vaccine antibody response after first vaccine dose .....        | 5 |
| <b>Table S5:</b> Comparison between time of sample collection and vaccine antibody response after second vaccine dose .....       | 6 |

**Table S1:** COVID-19 binding antibodies correlation with the number of vaccine doses and the history of prior infection

| Characteristic                          | Category | Anti-S1 IgG |          | Anti-RBD IgG |          |
|-----------------------------------------|----------|-------------|----------|--------------|----------|
|                                         |          | positive    | negative | positive     | negative |
| No. of doses                            | One      | 32          | 0        | 32           | 0        |
|                                         | Two      | 34          | 0        | 34           | 0        |
| History of COVID-19;<br>Anti-N positive | Yes      | 31          | 0        | 31           | 0        |
|                                         | No       | 35          | 0        | 35           | 0        |

**Table S2: Characteristics of patients with transfusion-dependent thalassemia**

| Characteristic                                        | Category | Total<br>n=51 (%) | Seropositive<br>(n=43) | Seronegative<br>(n=8) | p-Value |
|-------------------------------------------------------|----------|-------------------|------------------------|-----------------------|---------|
| Gender <sup>a</sup>                                   | Male     | 21 (41.1)         | 19 (44.2)              | 2 (25)                | 0.45    |
|                                                       | Female   | 30 (58.9)         | 24 (55.8)              | 6 (75)                |         |
| Age <sup>b</sup>                                      |          |                   | 31 (18-49)             | 32.5 (21-49)          | 0.65    |
| No. of doses <sup>a</sup>                             | One      | 23 (45)           | 16 (37.2)              | 7 (87.5)              | 0.02    |
|                                                       | Two      | 28 (55)           | 27 (62.8)              | 1 (12.5)              |         |
| Splenectomy <sup>a</sup>                              | Yes      | 30 (58.9)         | 24 (55.8)              | 6 (75)                | 0.45    |
|                                                       | No       | 21 (41.1)         | 19 (44.2)              | 2 (25)                |         |
| Hydroxyurea <sup>a</sup>                              | Yes      | 4 (7.8)           | 4 (9.3)                | 0 (0)                 | 1.0     |
|                                                       | No       | 47 (92.2)         | 39 (90.7)              | 8 (100)               |         |
| Hyperferritinemia<br>(>1000 ug/mL) <sup>a</sup>       | Yes      | 44 (86.2)         | 36 (83.7)              | 8 (100)               | 0.58    |
|                                                       | No       | 7 (13.8)          | 7 (16.3)               | 0 (0)                 |         |
| History of COVID-19 <sup>a</sup> ;<br>Anti-N positive | Yes      | 23 (45)           | 23 (53.5)              | 0 (0)                 | 0.006   |
|                                                       | No       | 28 (55)           | 20 (46.5)              | 8 (100)               |         |

<sup>a</sup> n (column percentage); <sup>b</sup> Mean (range)

**Table S3: Characteristics of patients with sickle cell disease**

| Characteristic                                        | Category | Total<br>n=15 (%) | Seropositive<br>(n=13) | Seronegative<br>(n=2) | p-Value |
|-------------------------------------------------------|----------|-------------------|------------------------|-----------------------|---------|
| Gender <sup>a</sup>                                   | Male     | 6 (40)            | 4 (30.8)               | 2 (100)               | 0.14    |
|                                                       | Female   | 9 (60)            | 9 (69.2)               | 0 (0)                 |         |
| Age <sup>b</sup>                                      |          |                   | 31.2 (18-39)           | 38.5 (38-39)          | 0.92    |
| No. of doses <sup>a</sup>                             | One      | 9 (60)            | 7 (53.9)               | 2 (100)               | 0.49    |
|                                                       | Two      | 6 (40)            | 6 (92.3)               | 0 (0)                 |         |
| Splenectomy <sup>a</sup>                              | Yes      | 1 (6.6)           | 1 (7.7)                | 0 (0)                 | 1.0     |
|                                                       | No       | 14 (93.4)         | 12 (44.2)              | 2 (100)               |         |
| Hydroxyurea <sup>a</sup>                              | Yes      | 13 (86.6)         | 11 (84.6)              | 2 (100)               | 1.0     |
|                                                       | No       | 2 (13.4)          | 2 (15.4)               | 0 (0)                 |         |
| Hyperferritinemia<br>(>1000 ug/mL) <sup>a</sup>       | Yes      | 10 (66.6)         | 9 (69.2)               | 1 (50)                | 1.0     |
|                                                       | No       | 5 (33.3)          | 4 (30.8)               | 1 (50)                |         |
| History of COVID-19 <sup>a</sup> ;<br>Anti-N positive | Yes      | 8 (53.3)          | 8 (61.5)               | 0 (0)                 | 0.2     |
|                                                       | No       | 7 (46.7)          | 5 (38.5)               | 2 (100)               |         |

<sup>a</sup> n (column percentage); <sup>b</sup> Mean (range)

**Table S4:** Comparison between time of sample collection and vaccine antibody response after first vaccine dose

| Time to sample collection           | Less than three months<br>n=37 |             | Three months or more<br>n=9 |             | <i>p</i> -Value |
|-------------------------------------|--------------------------------|-------------|-----------------------------|-------------|-----------------|
|                                     | Median                         | Range       | Median                      | Range       |                 |
| nAbs                                | 320                            | 10-10240    | 80                          | 10-5120     | 0.31            |
| Anti-RBD                            | 204800                         | 1600-409600 | 25600                       | 6400-409600 | 0.08            |
| Anti-S1                             | 204800                         | 1600-409600 | 51200                       | 6400-409600 | 0.14            |
| Days from vaccination to collection | 36                             | 15-83       | 106                         | 94-136      | N/A             |

All the above tests were done using the Mann–Whitney test

**Table S5: Comparison between time of sample collection and vaccine antibody response after second vaccine dose**

| Time to sample collection           | Less than three months<br>n=25 |              | Three months or more<br>n=9 |              | <i>p</i> -Value |
|-------------------------------------|--------------------------------|--------------|-----------------------------|--------------|-----------------|
|                                     | Median                         | Range        | Median                      | Range        |                 |
| nAbs                                | 5120                           | 10-20480     | 1280                        | 20-10240     | 0.1             |
| Anti-RBD                            | 409600                         | 12800-409600 | 102400                      | 12800-409600 | 0.24            |
| Anti-S1                             | 409600                         | 12800-409600 | 204800                      | 6400-409600  | 0.16            |
| Days from vaccination to collection | 50                             | 17-88        | 106                         | 93-155       | N/A             |

All the above tests were done using the Mann–Whitney test
